# Supplementary material for: Analogs of the Catechol Derivative Dynasore Inhibit HIV-1 Ribonuclease H, SARS-CoV-2 nsp14 Exoribonuclease, and Virus Replication
Source: MDPI journal article supplement (doi:10.3390/v15071539), 2023-07-13

## Supplementary Materials

# Analogs of the Catechol Derivative Dynasore Inhibit HIV-1 Ribonuclease H, SARS-CoV-2 nsp14 Exoribonuclease, and Virus Replication

Abhishek Asthana <sup>1</sup>, Angela Corona <sup>2</sup>, Woo-Jin Shin <sup>1</sup>, Mi-Jeong Kwak <sup>1</sup>, Christina Gaughan <sup>1</sup>, Enzo Tramontano <sup>2</sup>, Jae U. Jung <sup>1</sup>, Rainer Schobert <sup>3</sup>, Babal Kant Jha <sup>4</sup>, Robert H. Silverman <sup>1,\*</sup> and Bernhard Biersack <sup>3,\*</sup>

<sup>1</sup> Cancer Biology, Lerner Research Institute, Cleveland Clinic, 2111 East 96th St, Cleveland, OH 44106, USA; asthana@ccf.org, gaughac@ccf.org, shinw2@ccf.org, kwakm@ccf.org, jungj@ccf.org, silverr@ccf.org

<sup>2</sup> Laboratorio di Virologia Molecolare, Dipartimento di Scienze della Vita e Dell'Ambiente, Università degli Studi di Cagliari, Cittadella Universitaria di Monserrato SS554, 09042 Monserrato, Italy; angela.corona@unica.it, tramon@unica.it

<sup>3</sup> Organic Chemistry 1, University of Bayreuth, Universitätsstrasse 30, 95440 Bayreuth, Germany; rainer.schobert@uni-bayreuth.de, bernhard.biersack@yahoo.com

<sup>4</sup> Center for Immunotherapy and Precision Immuno-Oncology, Lerner Research Institute and Department of Translational Hematology and Oncology Research, Taussig Cancer Institute, Cleveland Clinic, 2111 East 96th St, Cleveland, OH 44195, USA; jhab@ccf.org

\* Correspondence: silverr@ccf.org (R.H.S.), bernhard.biersack@yahoo.com (B.B.)

<sup>1</sup>H NMR spectrum of **1a**

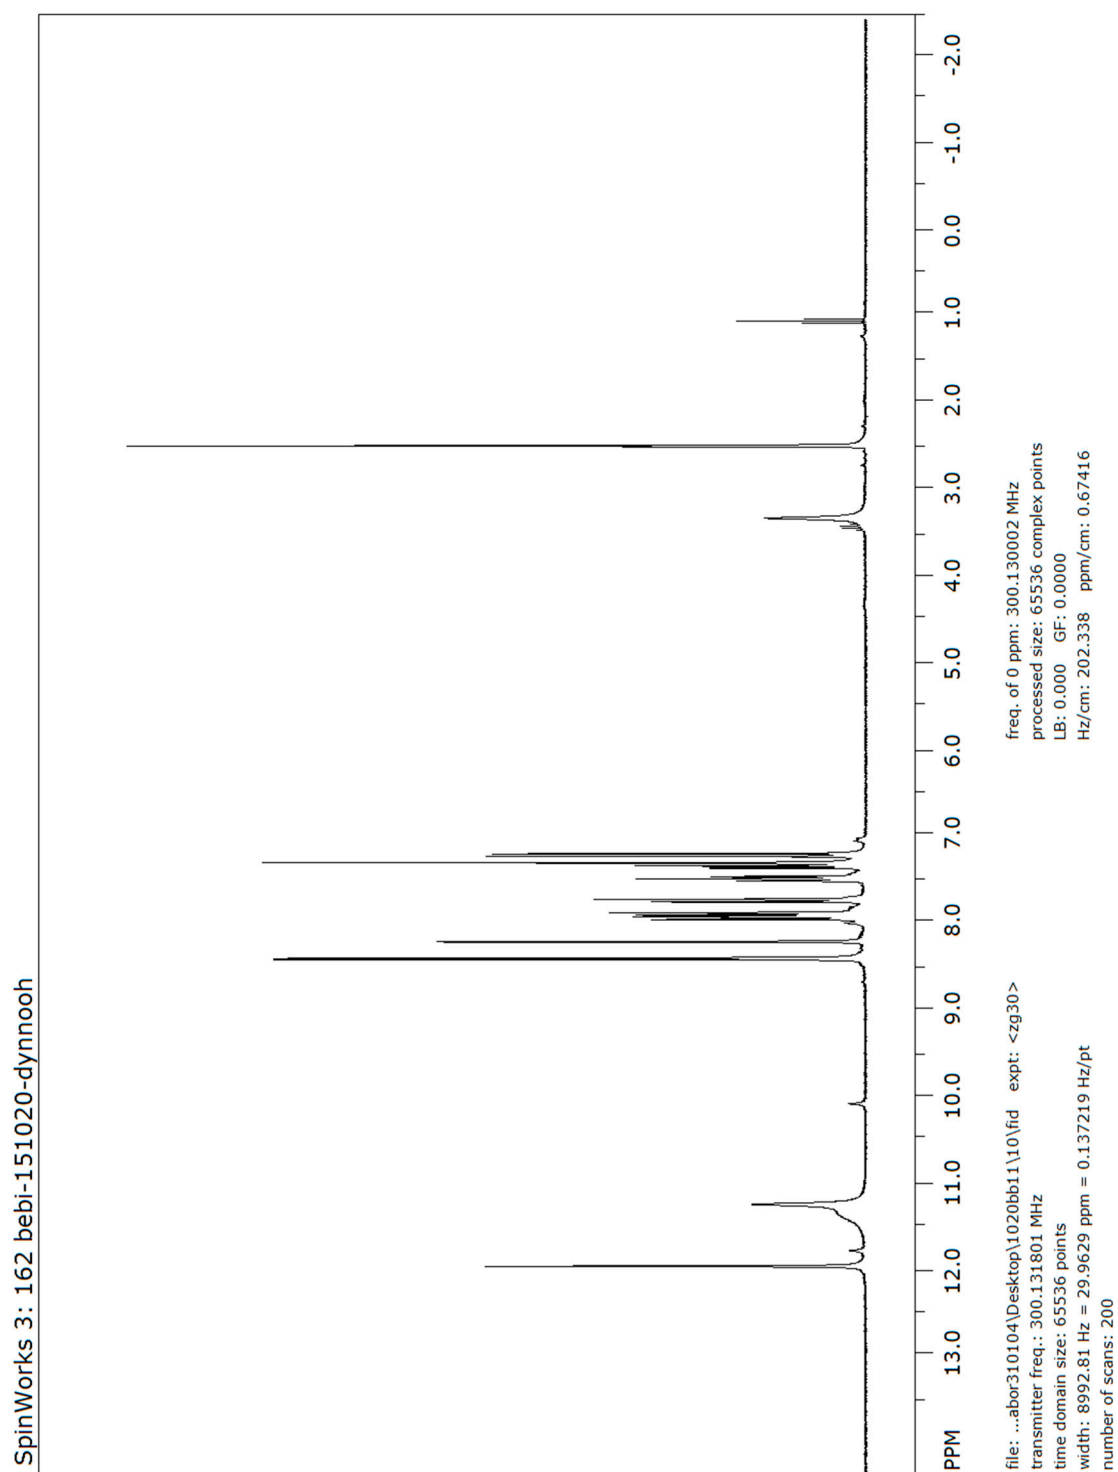

$^{13}\text{C}$  NMR spectrum of **1a**

SpinWorks 3: 162 bebi-151020-dynnooh

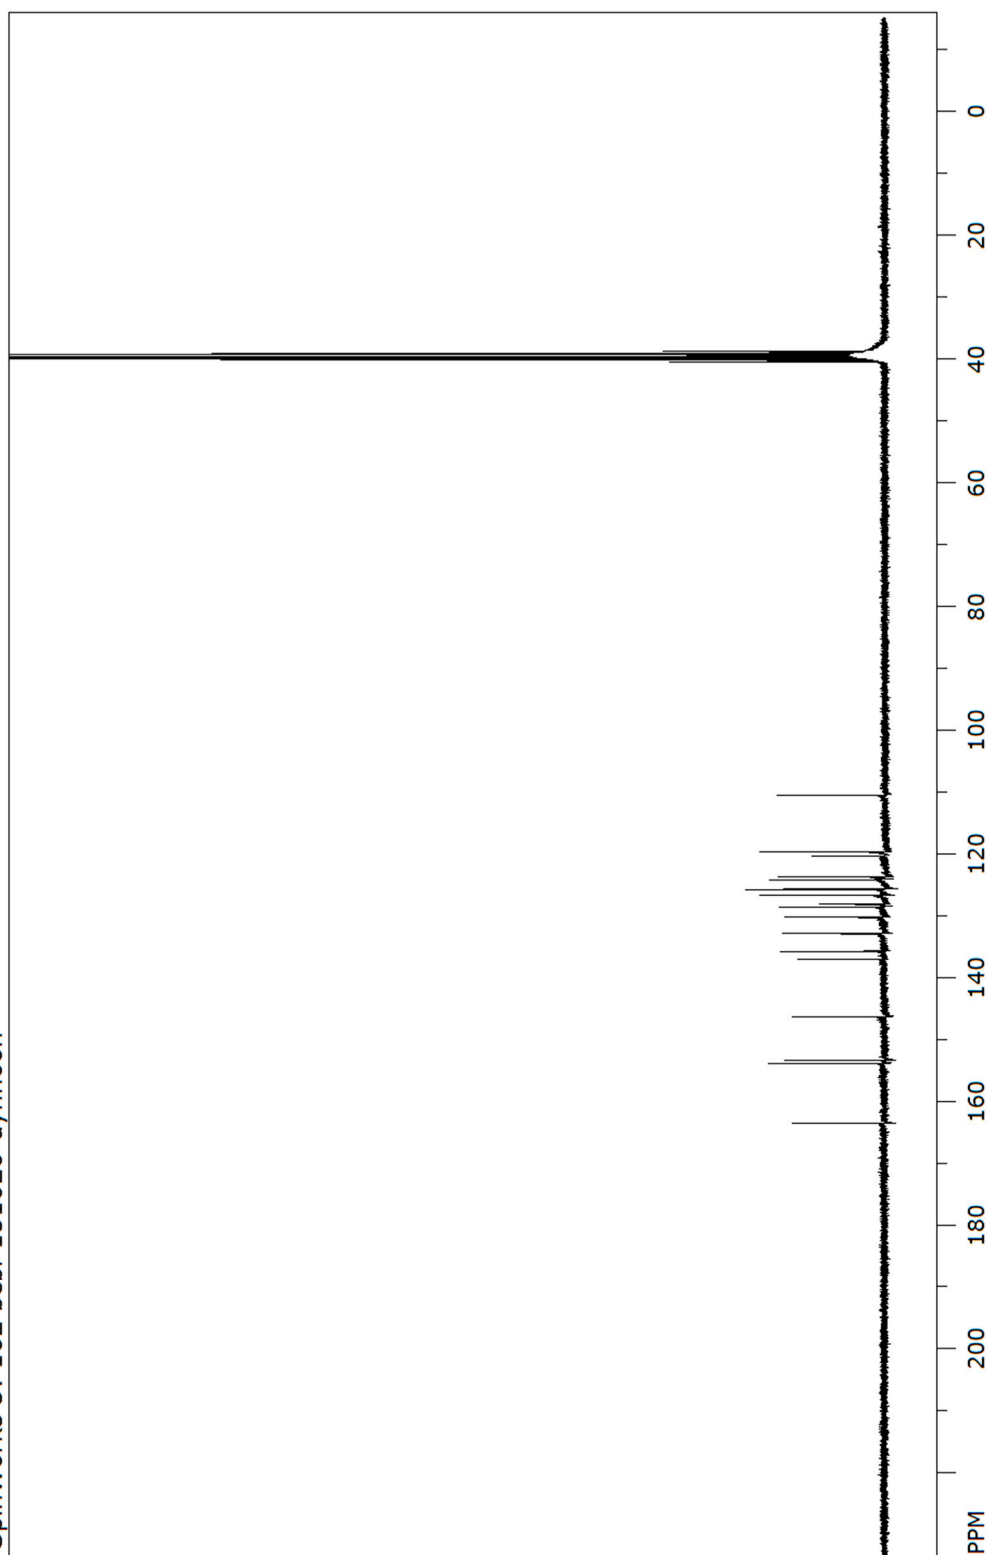

freq. of 0 ppm: 75.467787 MHz  
processed size: 32768 complex points  
LB: 0.000 GF: 0.0000  
Hz/cm: 753.296 ppm/cm: 9.98059

file: ...abor310104\Desktop\1020bb11\20\fid expt: <zpgpg30>  
transmitter freq.: 75.476050 MHz  
time domain size: 32768 points  
width: 18832.39 Hz = 249.5148 ppm = 0.574719 Hz/pt  
number of scans: 43040

$^1\text{H}$  NMR spectrum of **1b**

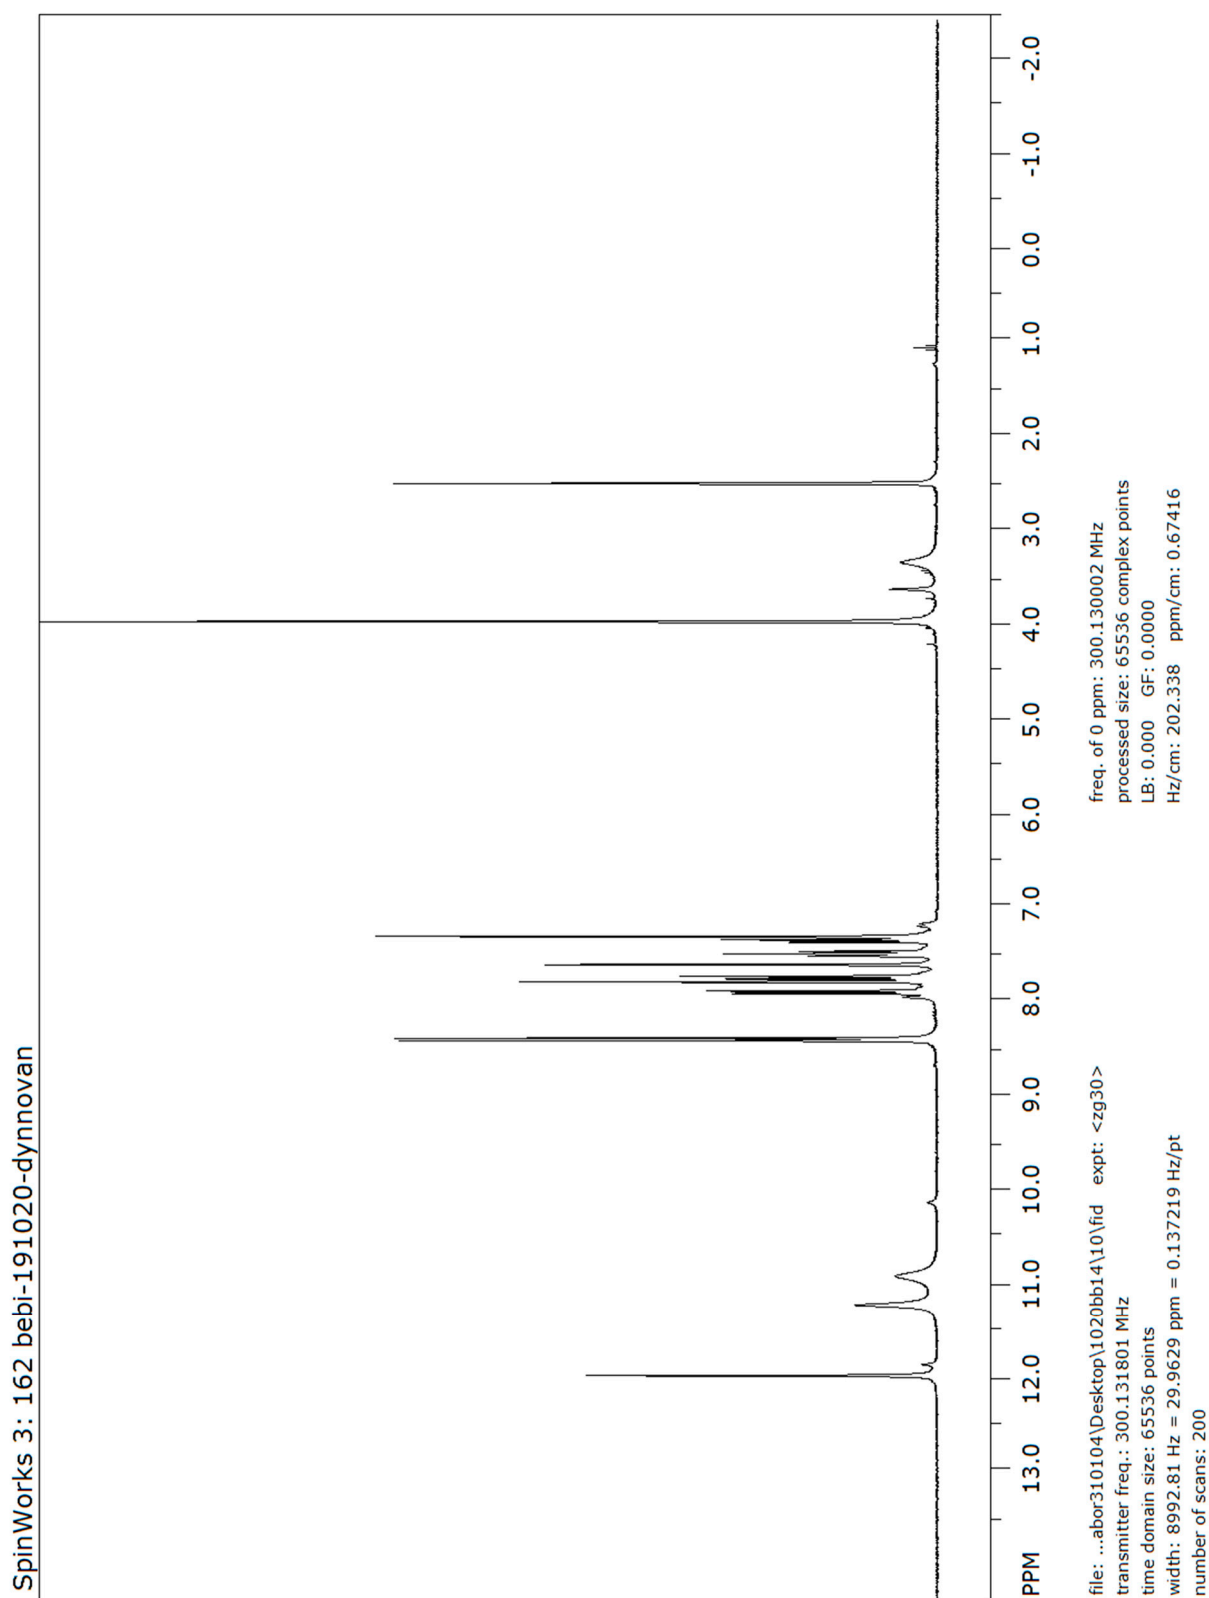

$^{13}\text{C}$  NMR spectrum of **1b**

SpinWorks 3: 162 bebi-191020-dynnovan

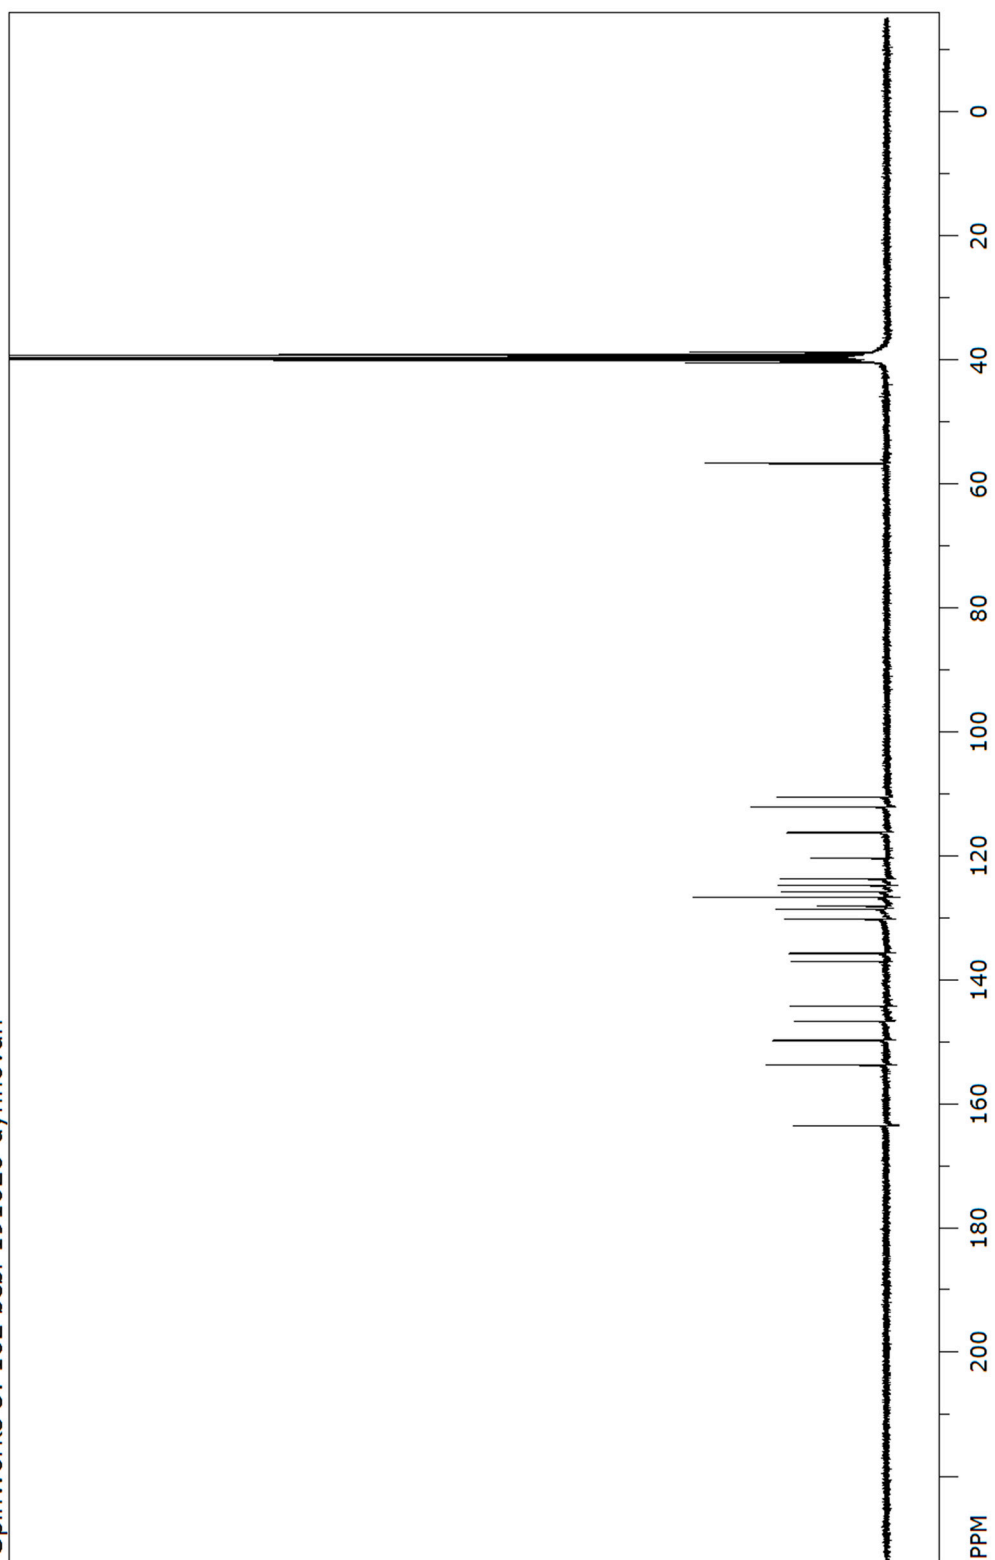

freq. of 0 ppm: 75.467787 MHz  
processed size: 32768 complex points  
LB: 0.000 GF: 0.0000  
Hz/cm: 753.296 ppm/cm: 9.98059

file: ...abor310104\Desktop\1020bb14\11\fid expt: <zpgp30>  
transmitter freq.: 75.476050 MHz  
time domain size: 32768 points  
width: 18832.39 Hz = 249.5148 ppm = 0.574719 Hz/pt  
number of scans: 46984

<sup>1</sup>H NMR spectrum of **1c**

SpinWorks 3: 162 bebi-201020-dynnocat

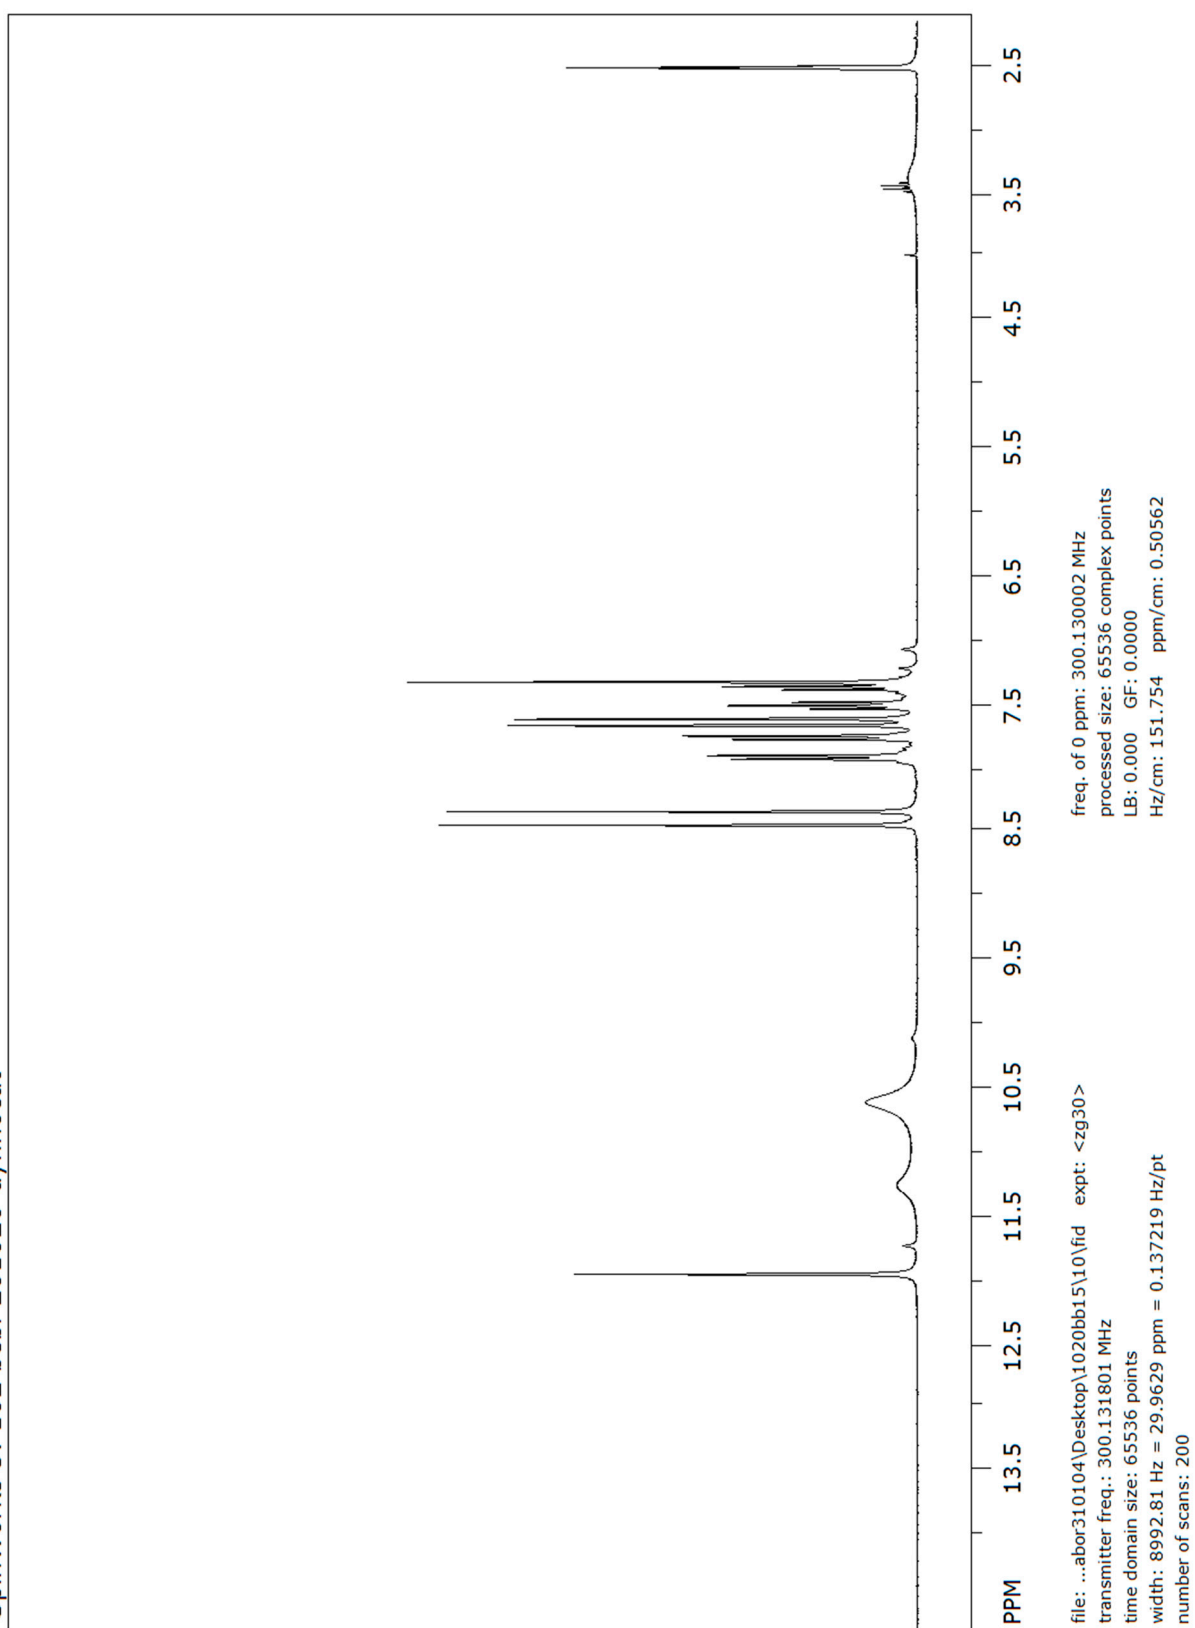

[illegible]

$^{13}\text{C}$  NMR spectrum of **1c**

SpinWorks 3: 162 bebi-201020-dynnocat

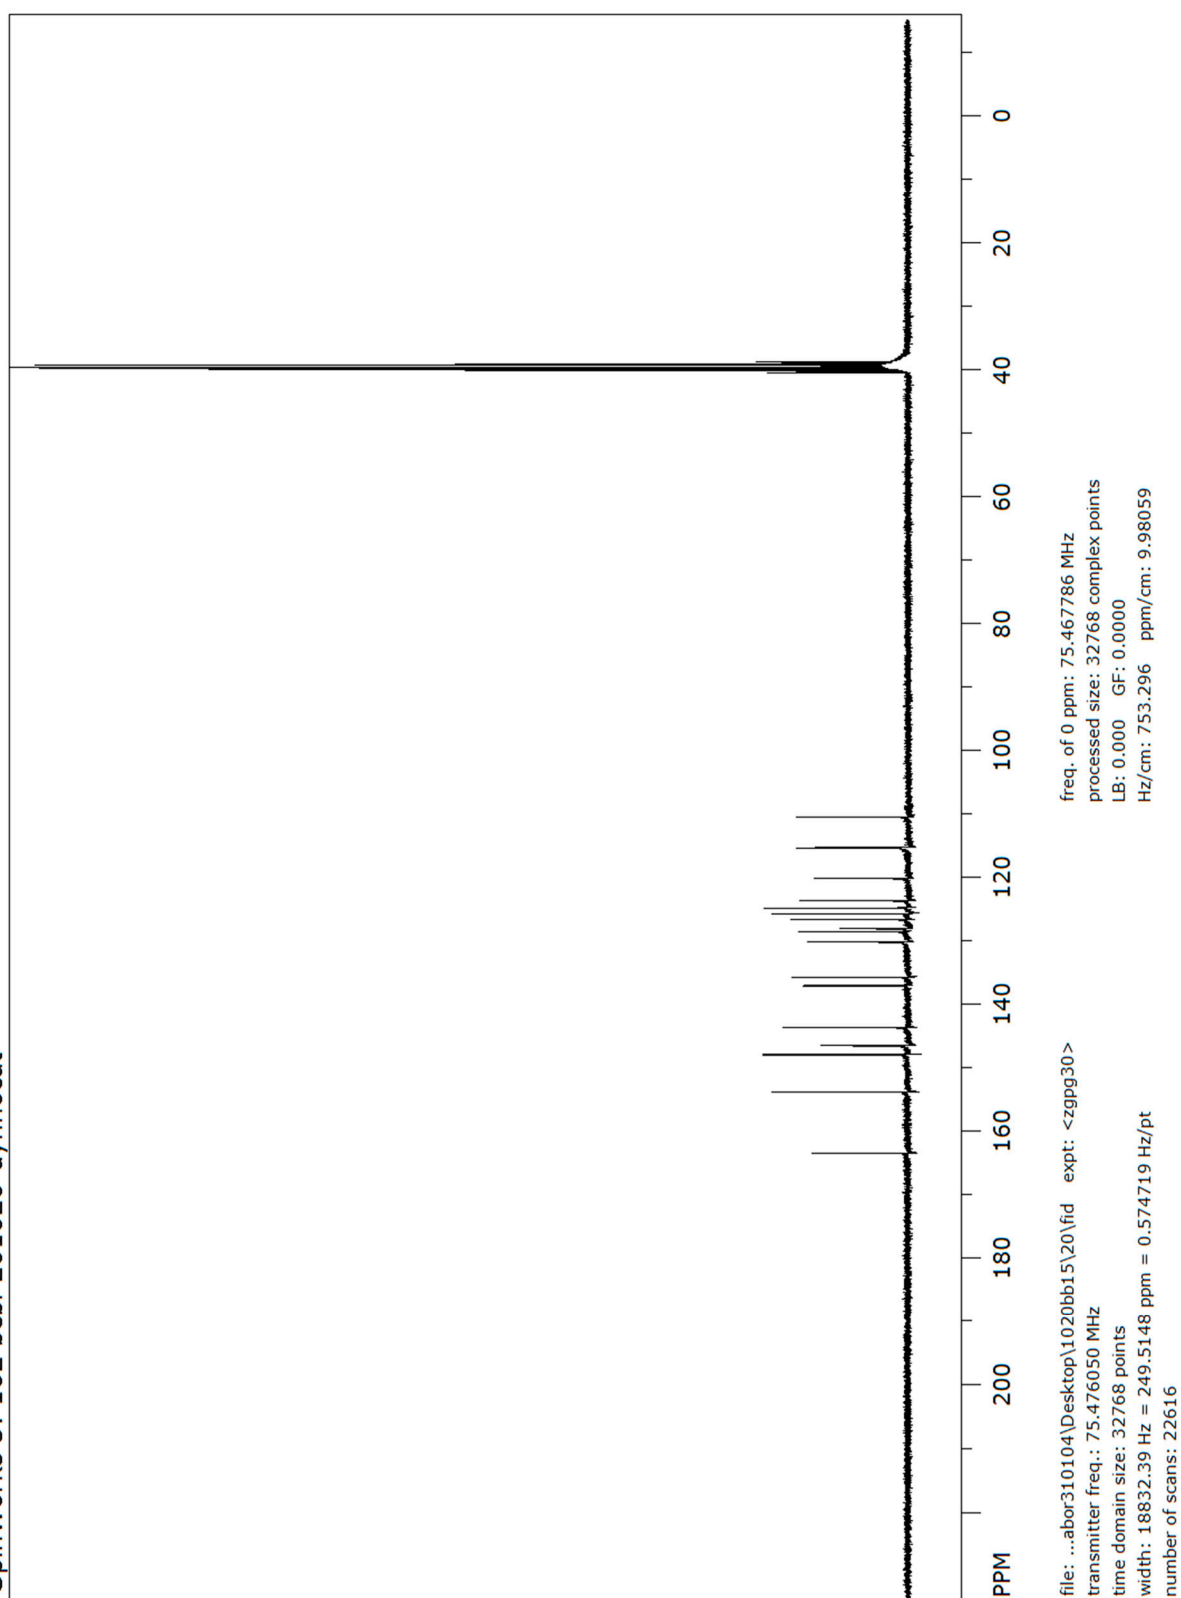



<sup>1</sup>H NMR spectrum of **1e**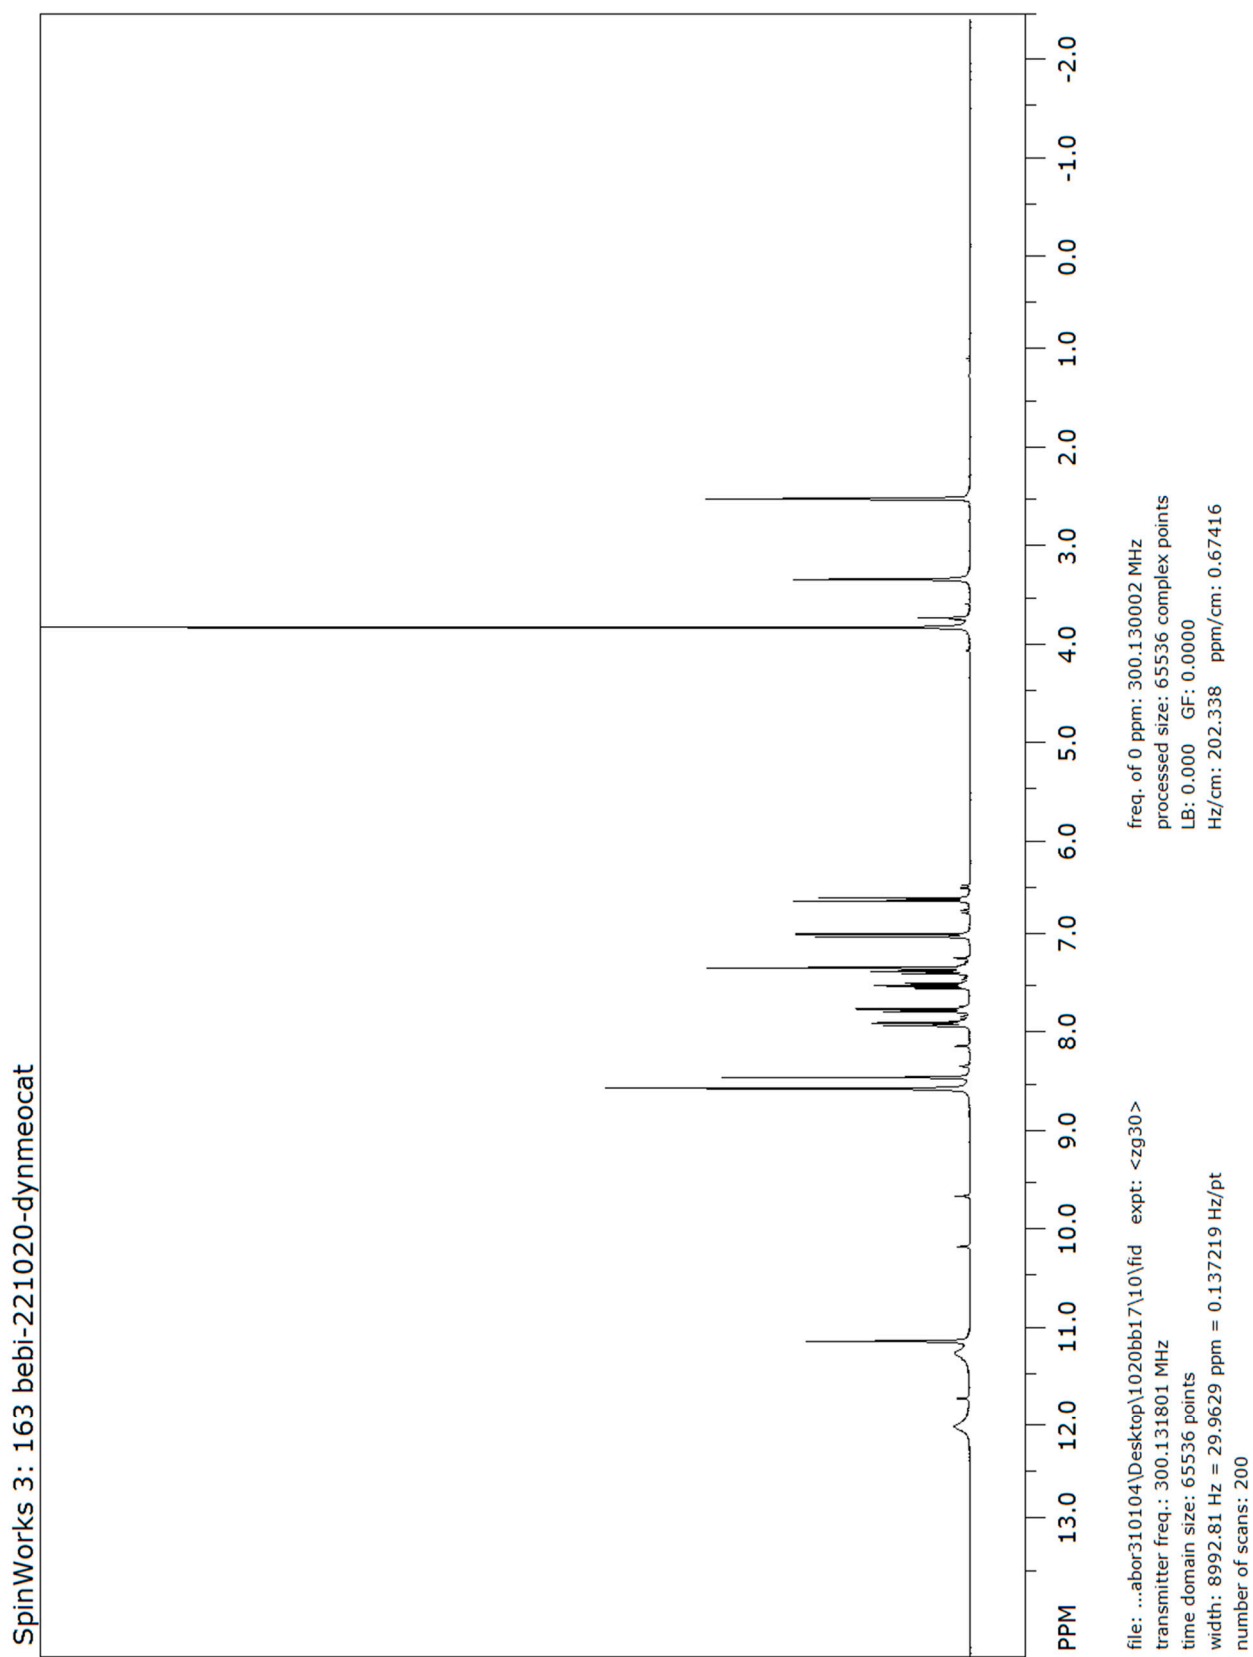

$^{13}\text{C}$  NMR spectrum of **1e**

SpinWorks 3: 163 bebi-221020-dynmeocat

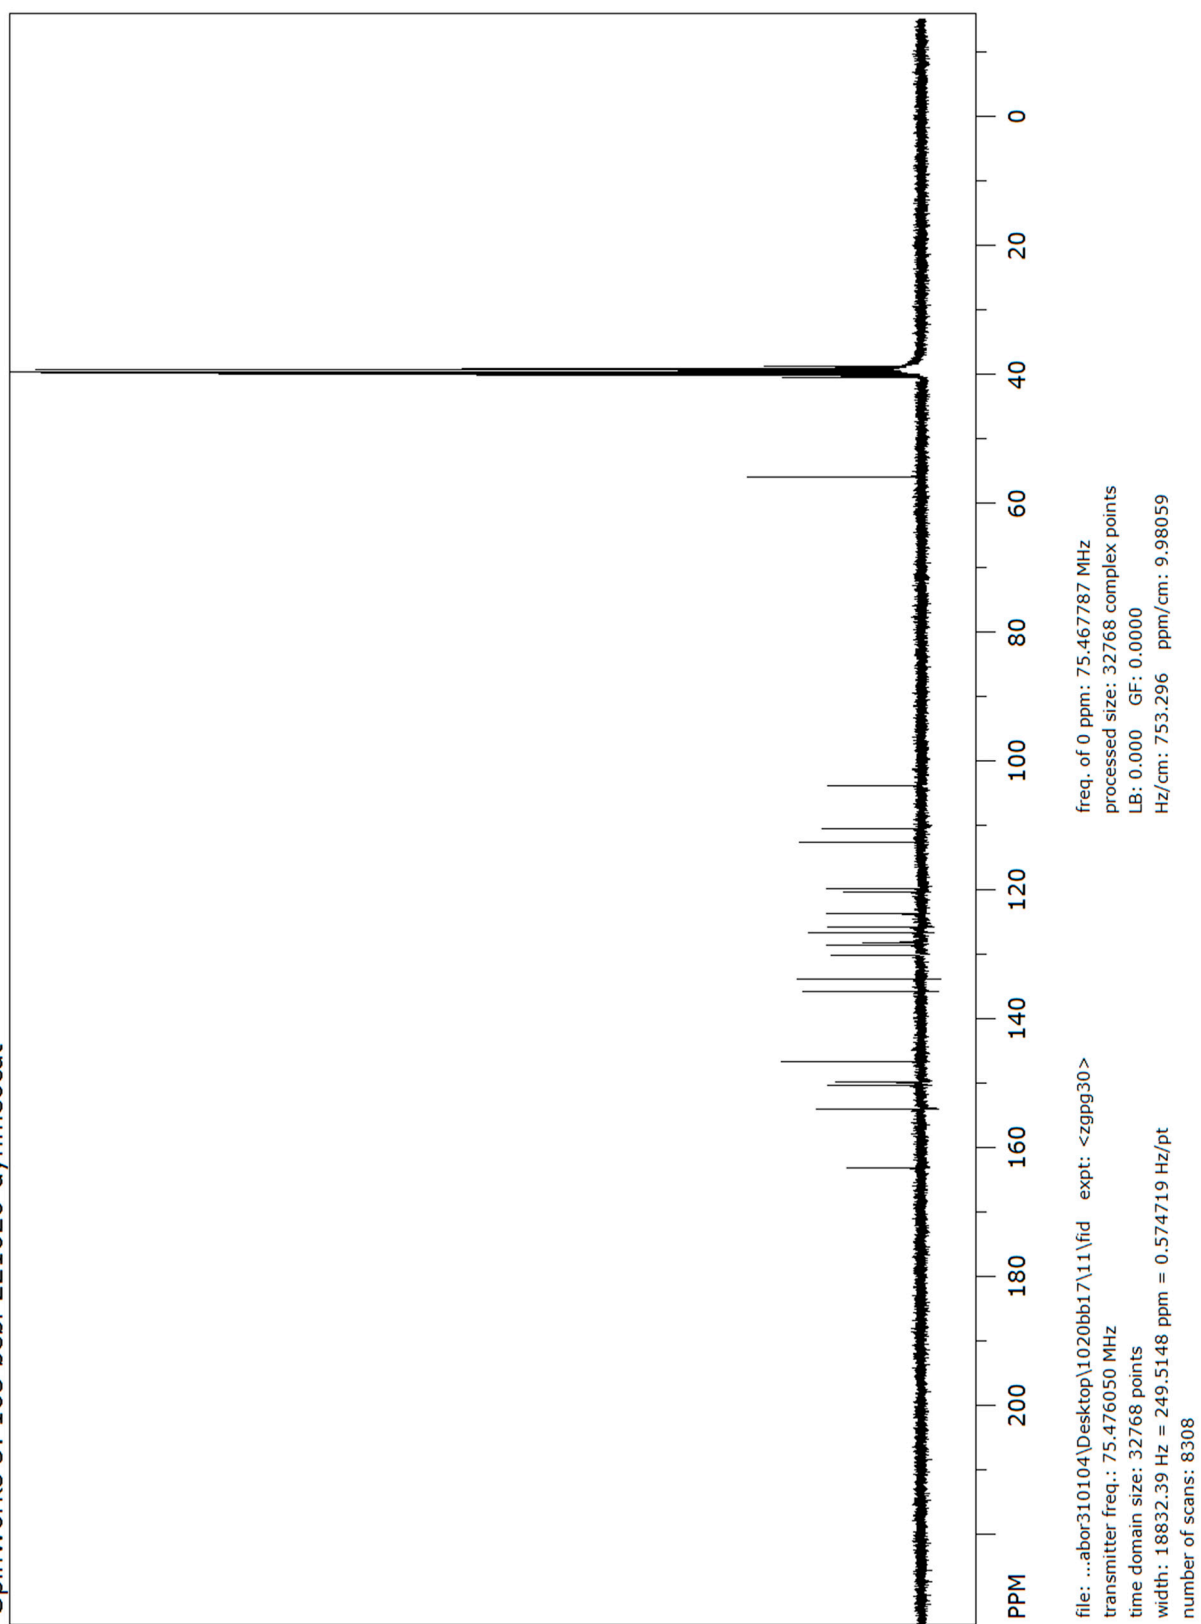

<sup>1</sup>H NMR spectrum of **11**

SpinWorks 3: 168 bebi-101120-dynpipaz

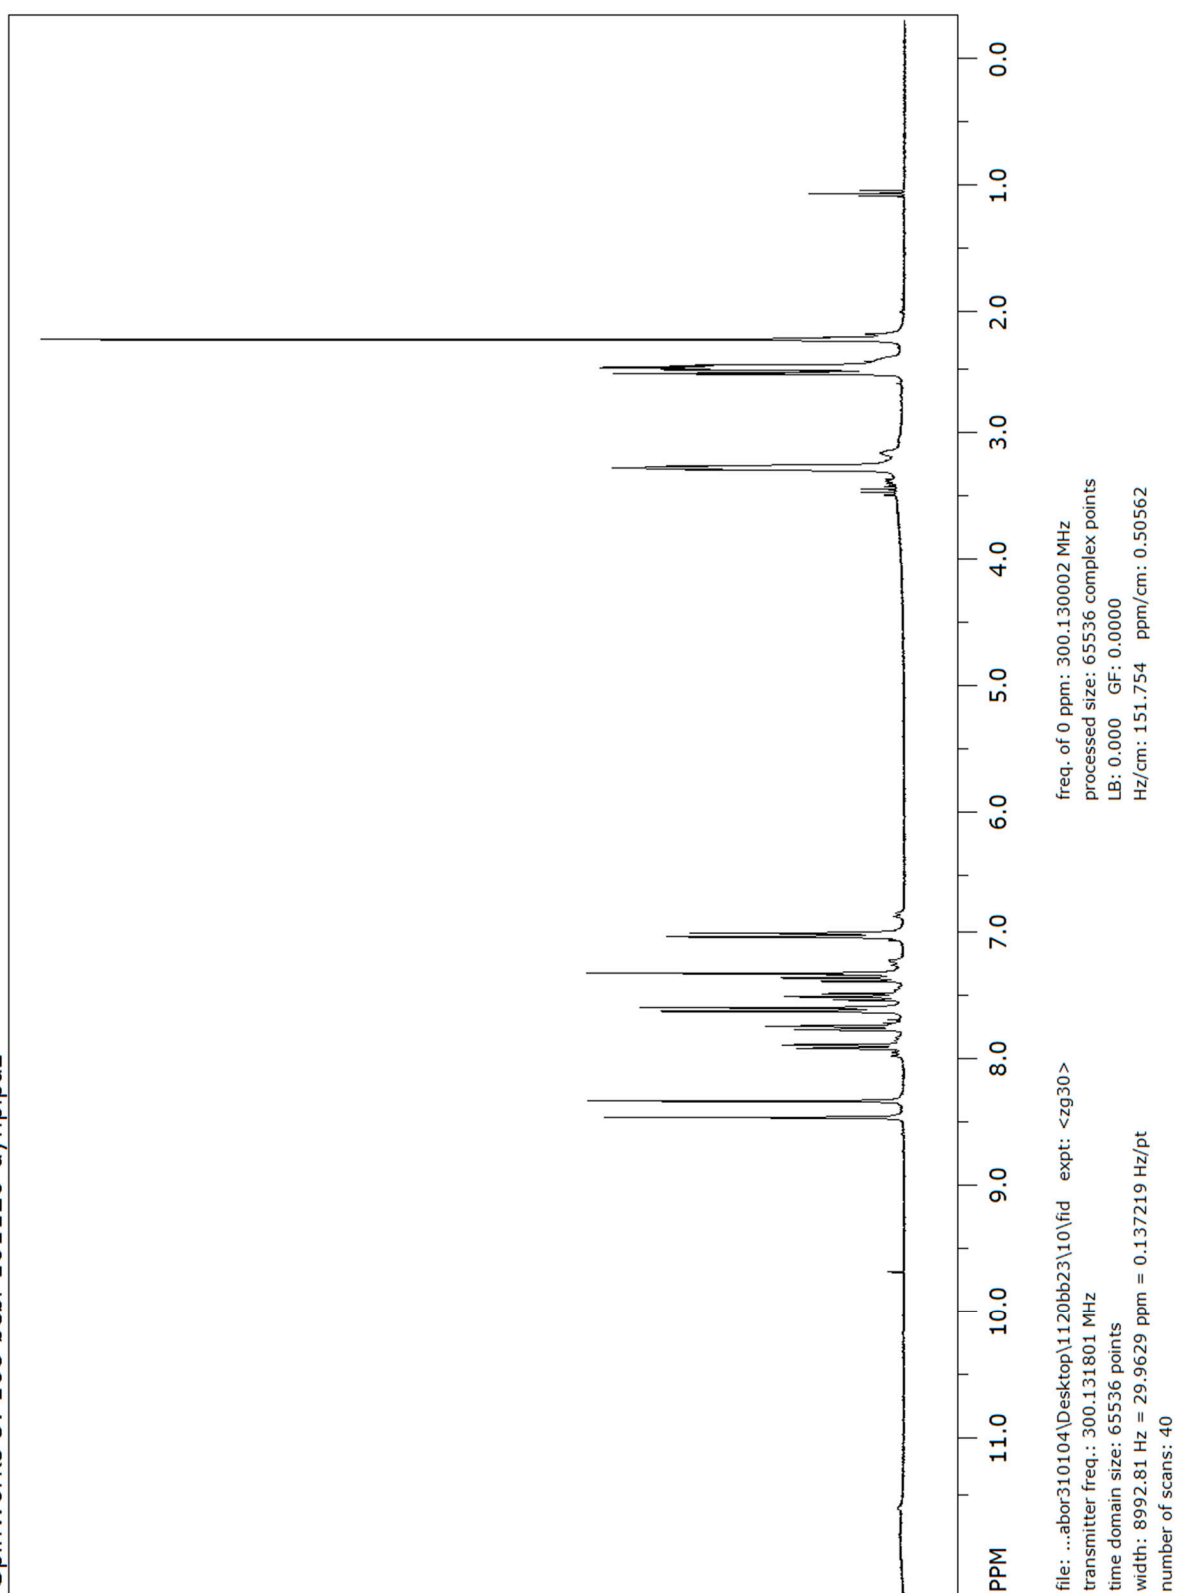

$^{13}\text{C}$  NMR spectrum of **11**

SpinWorks 3: 168 bebi-101120-dynpipaz

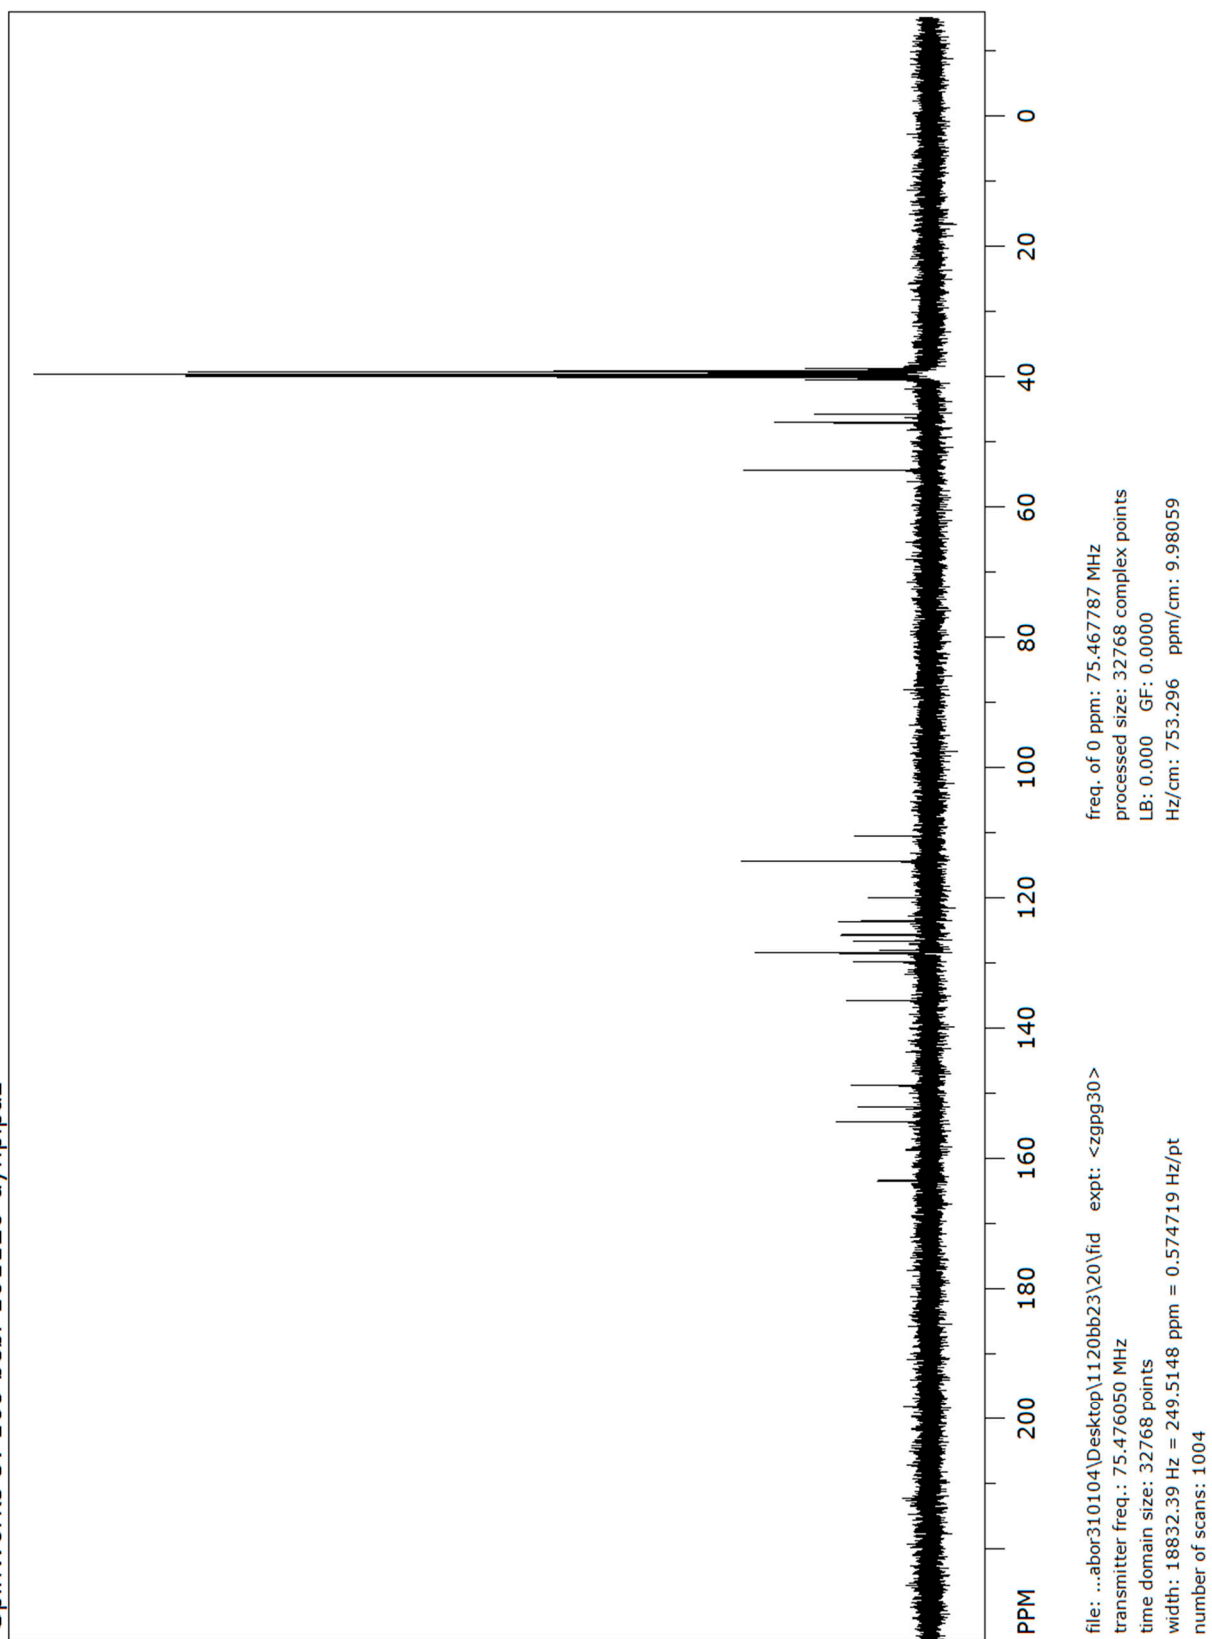

$^1\text{H}$  NMR spectrum of **2a**

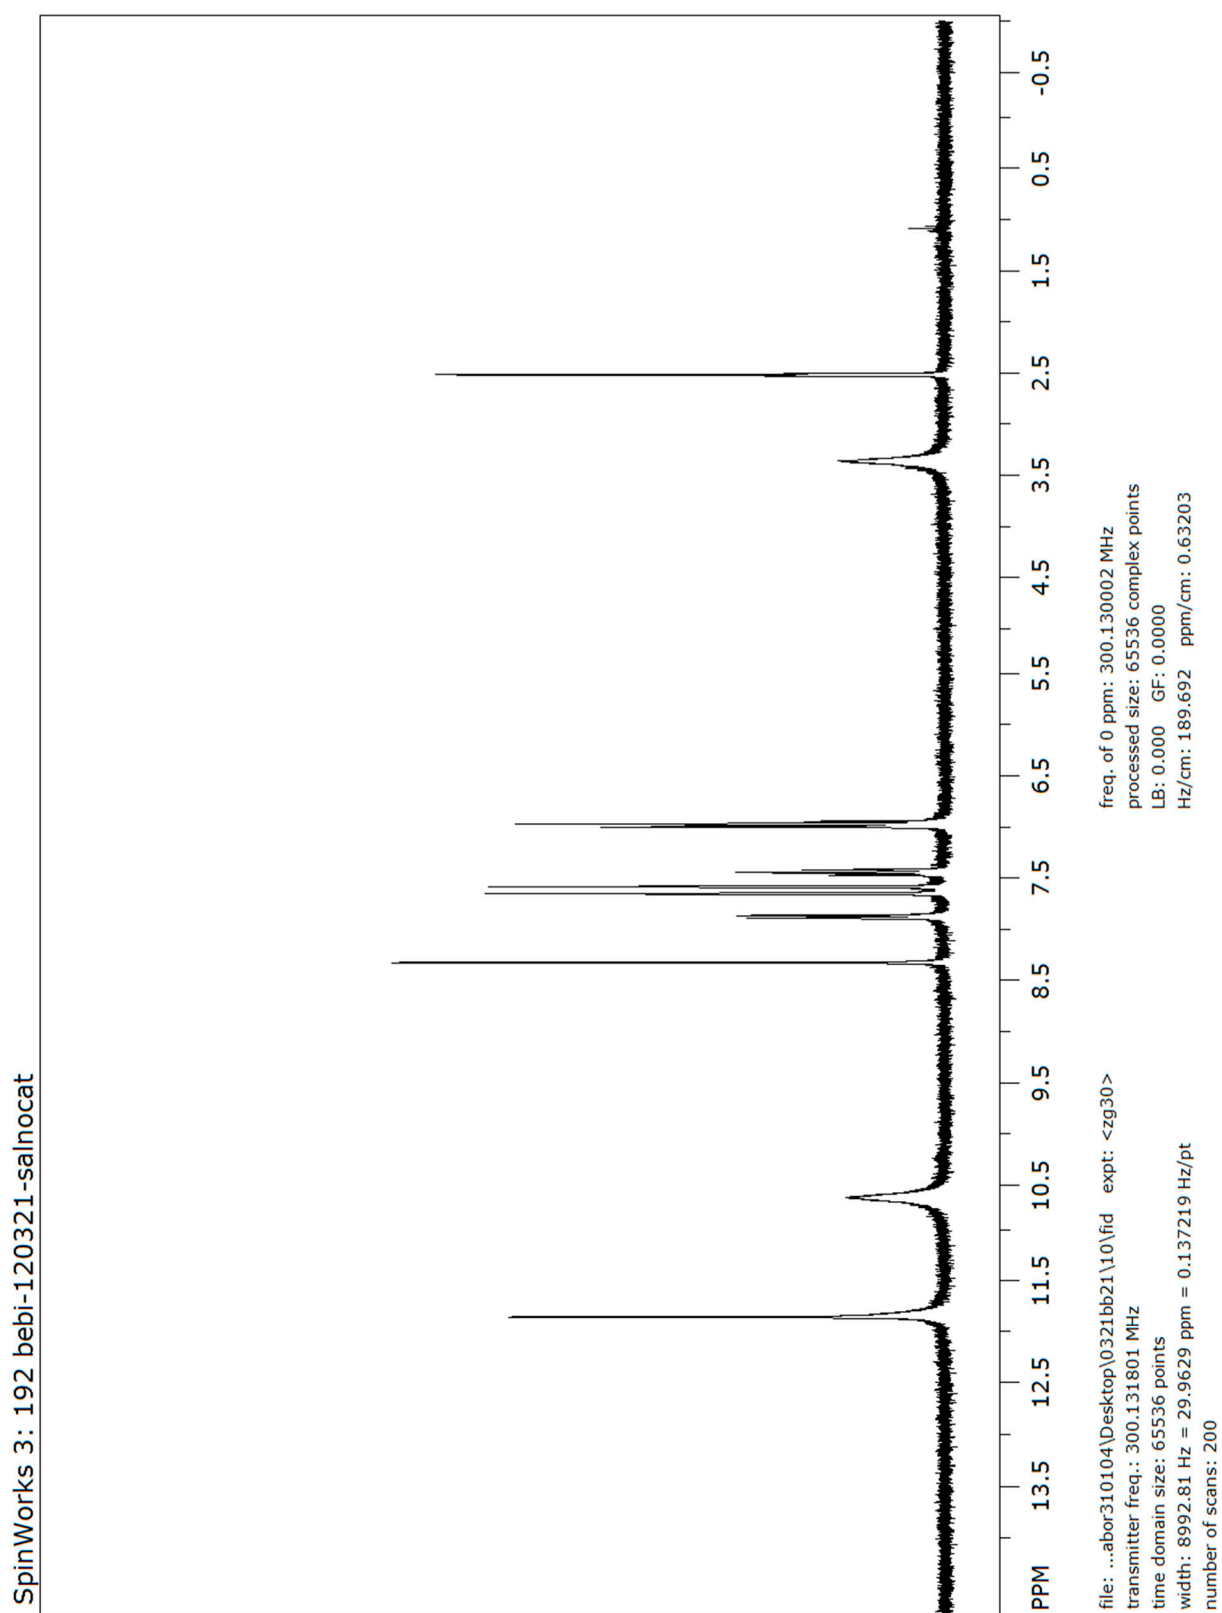

<sup>1</sup>H NMR spectrum of **2b**

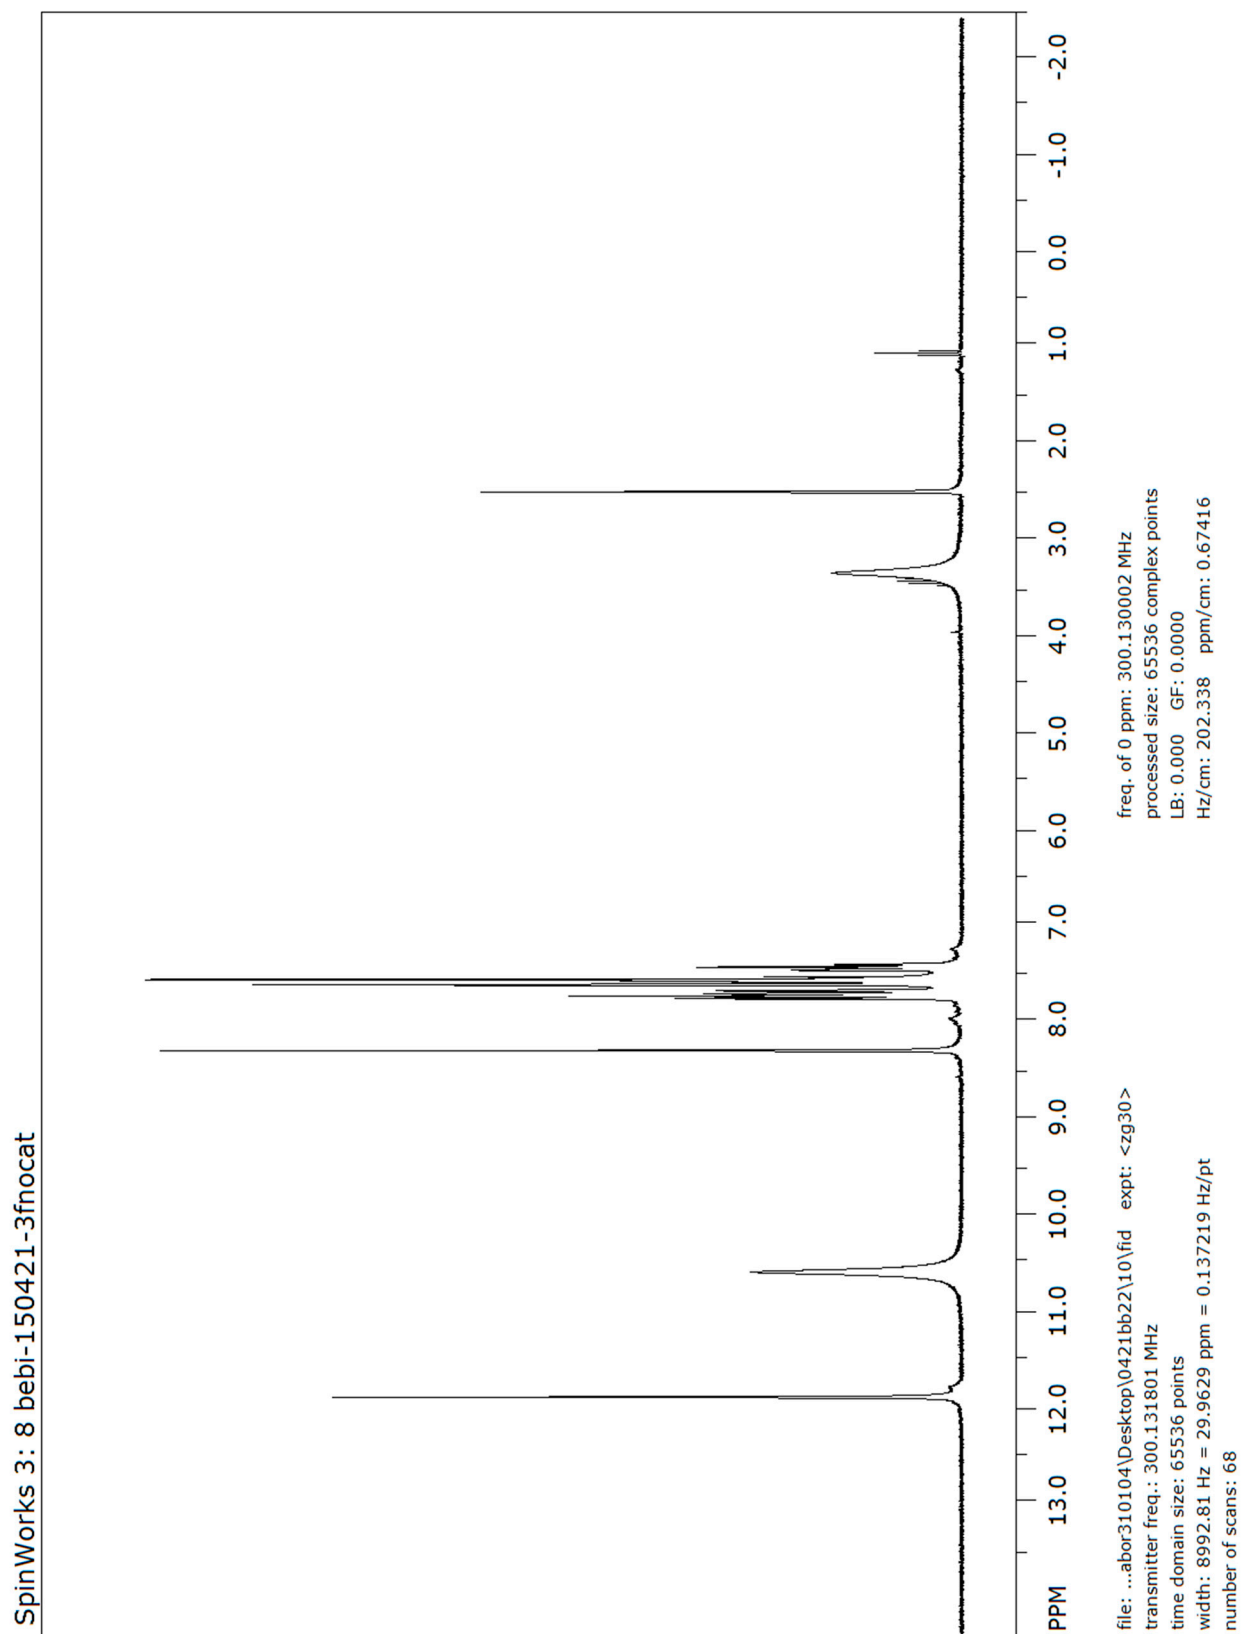

$^{13}\text{C}$  NMR spectrum of **2b**

SpinWorks 3: 8 bebi-150421-3fnocat

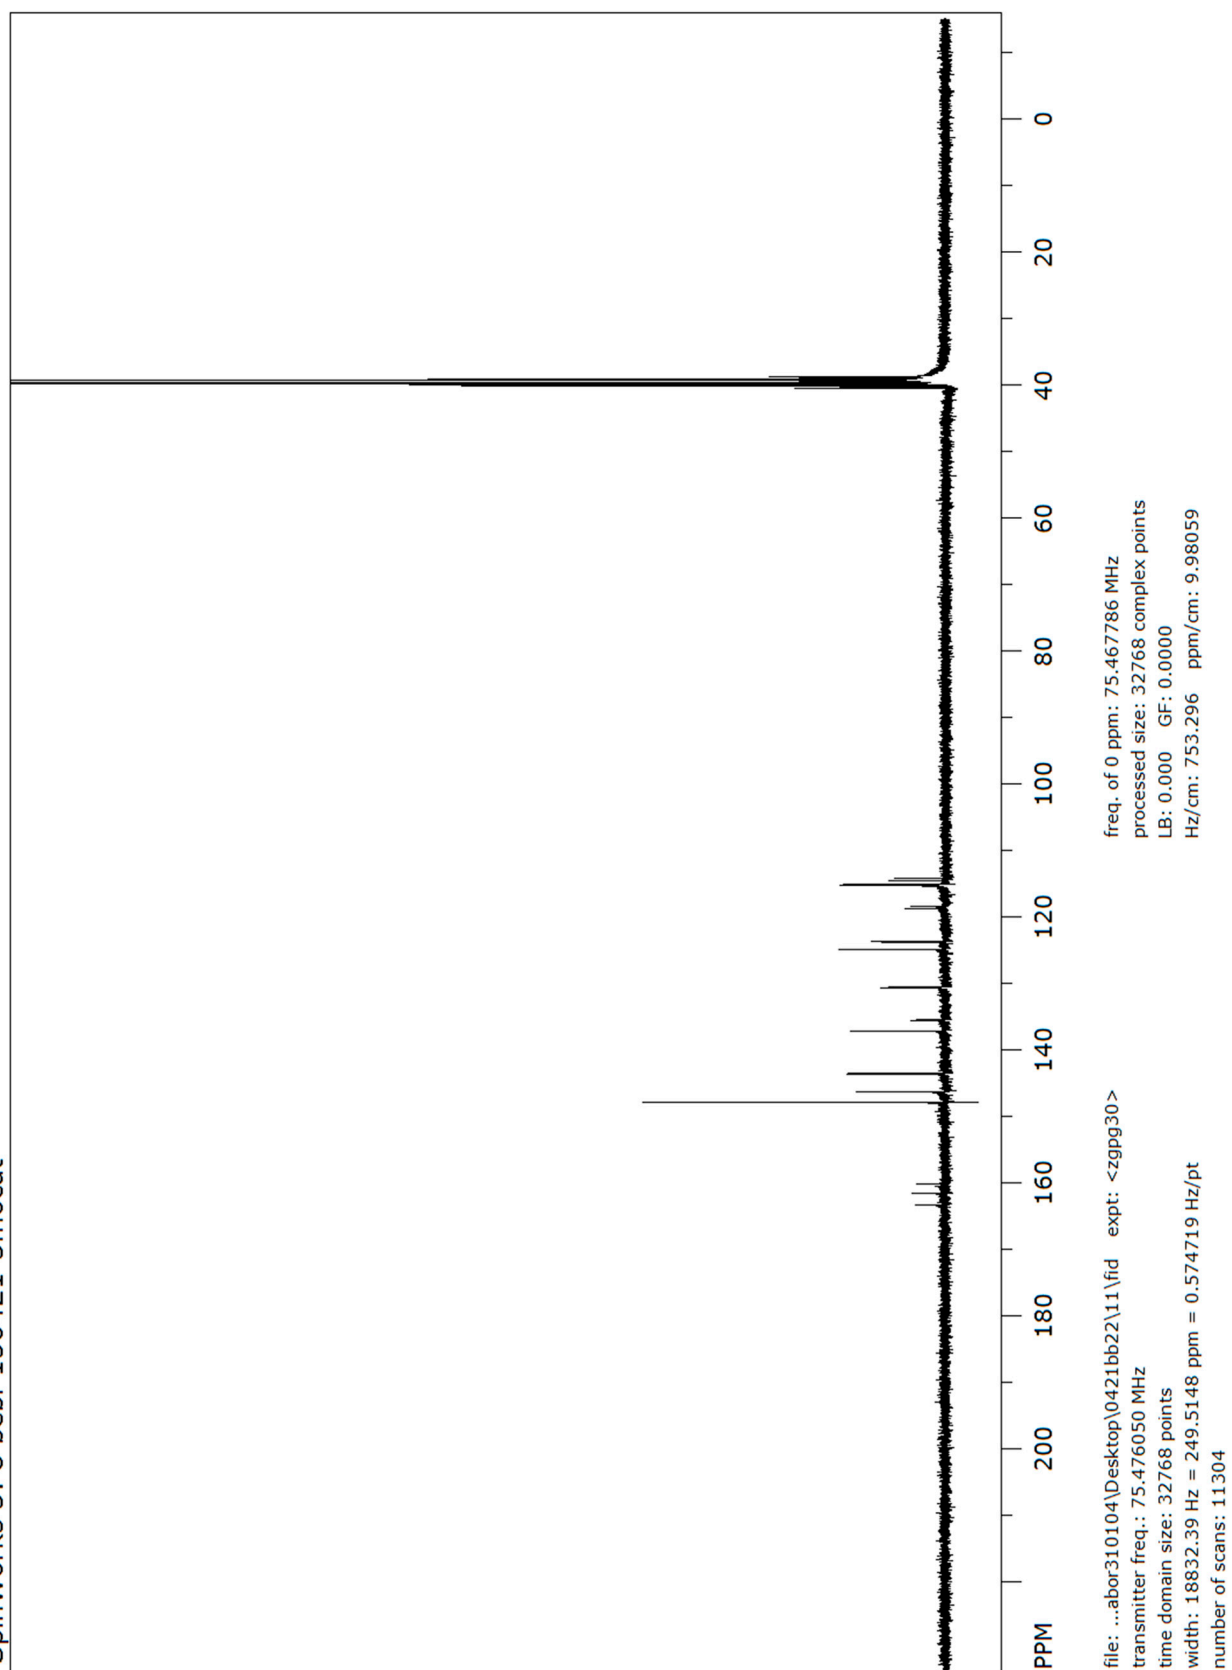

<sup>1</sup>H NMR spectrum of **2c**

SpinWorks 3: 9 bebi-190421-niconocat

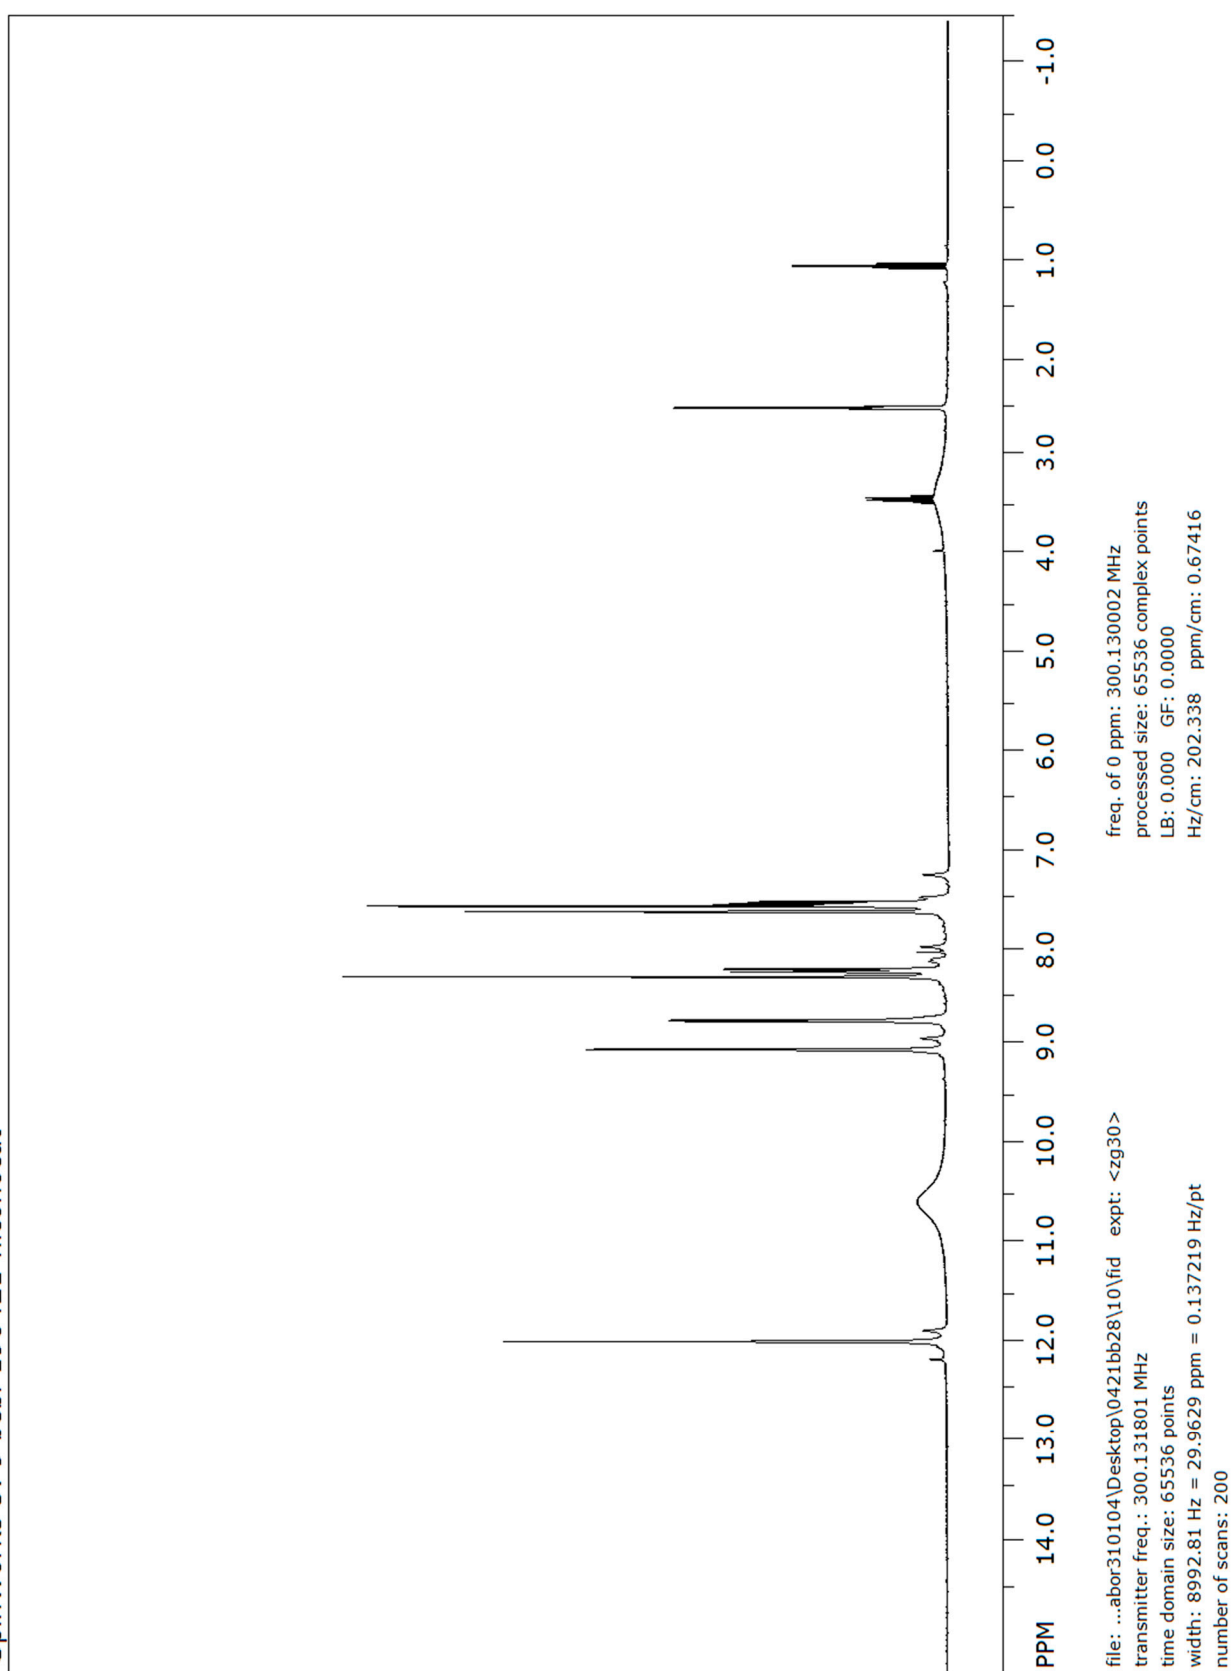



$^{13}\text{C}$  NMR spectrum of **2c**

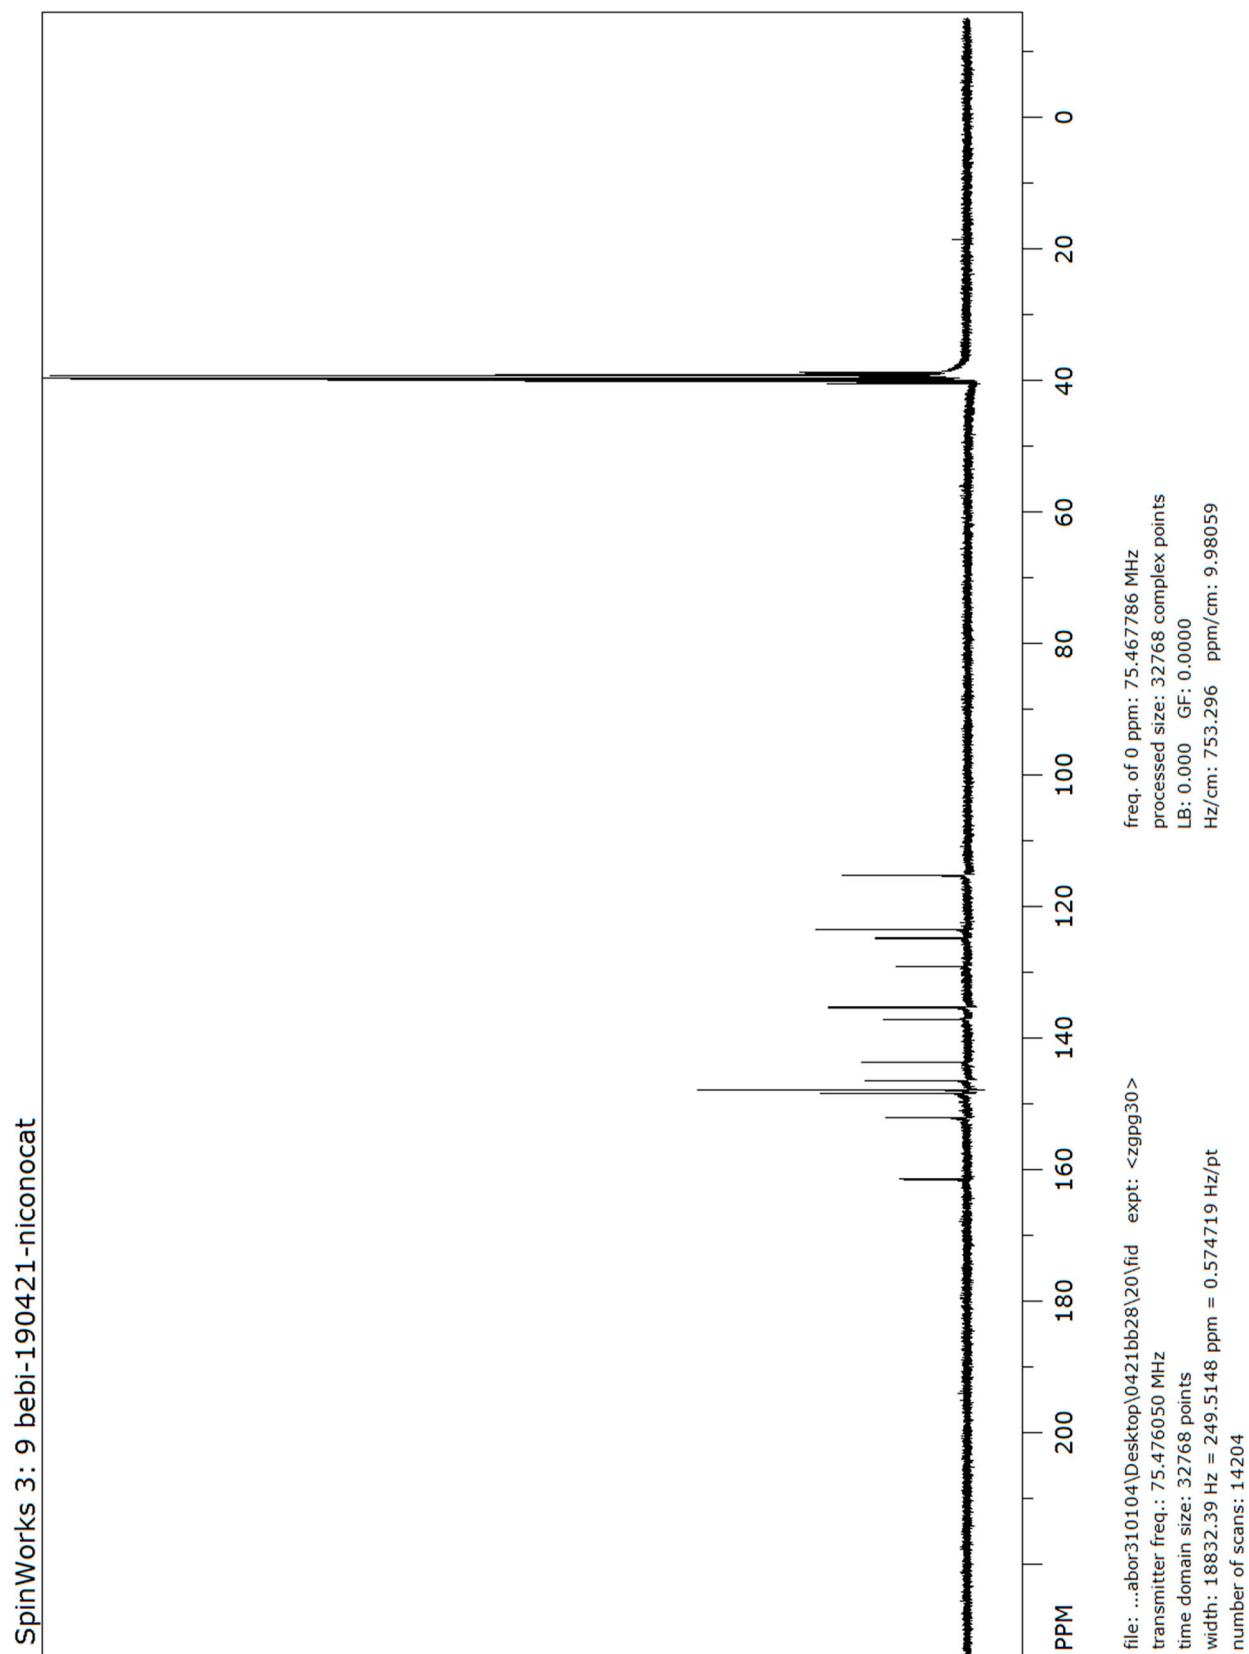

Supplement: s1 [file s1]
